# Supplementary material for: Gold Nanoparticles Functionalized with Peptides for Specific Affinity Aggregation Assays of Estrogen Receptors and Their Agonists
Source: Sensors (Basel). 2012 Apr 18;12(4):4952–61. doi: 10.3390/s120404952 (PMC3355452; doi:10.3390/s120404952)
Supplement: Supplementary file 1 [file sensors-12-04952-s001.pdf]

## Gold Nanoparticles Functionalized with Peptides for Specific Affinity Aggregation Assays of Estrogen Receptors and Their Agonists

Yoshiyuki Takatsuji, Shinya Ikeno and Tetsuya Haruyama \*

Department of Biological Functions and Engineering, Kyushu Institute of Technology, Kitakyushu Science and Research Park, Kitakyushu, Fukuoka 808-0196, Japan;

E-Mails: takatsuji-yoshiyuki@edu.life.kyutech.ac.jp (Y.T.); ikeno@life.kyutech.ac.jp (S.I.)

\* Author to whom correspondence should be addressed; E-Mail: haruyama@life.kyutech.ac.jp.

*Received: 26 March 2012; in revised form: 9 April 2012 / Accepted: 16 April 2012 /*

*Published: 18 April 2012*

---

Synthesized FP1 were confirmed by HPCL and MALDITOF MS (Figures S1 and S2).

**Figure S1.** HPLC analysis of synthesized FP1 using XTerra MS C18 (4.6 × 150 mm × 3 μm) with UV detect at 220 nm (Linear gradients between 0% CH<sub>3</sub>CN and 100% H<sub>2</sub>O to 75% CH<sub>3</sub>CN and 25% H<sub>2</sub>O in 15 min at a flow rate of 2 mL/min).

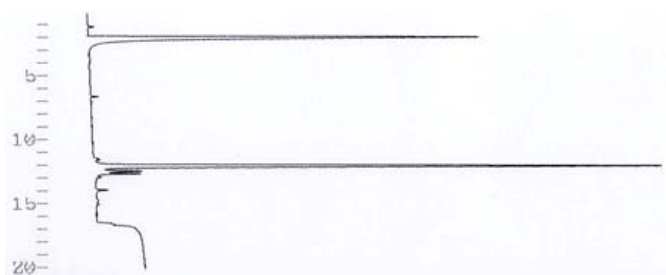

**Figure S2.** MALDI TOFMS spectrum of synthesized FP1 with  $\alpha$ -cyano-4-hydroxycinnamic acid.

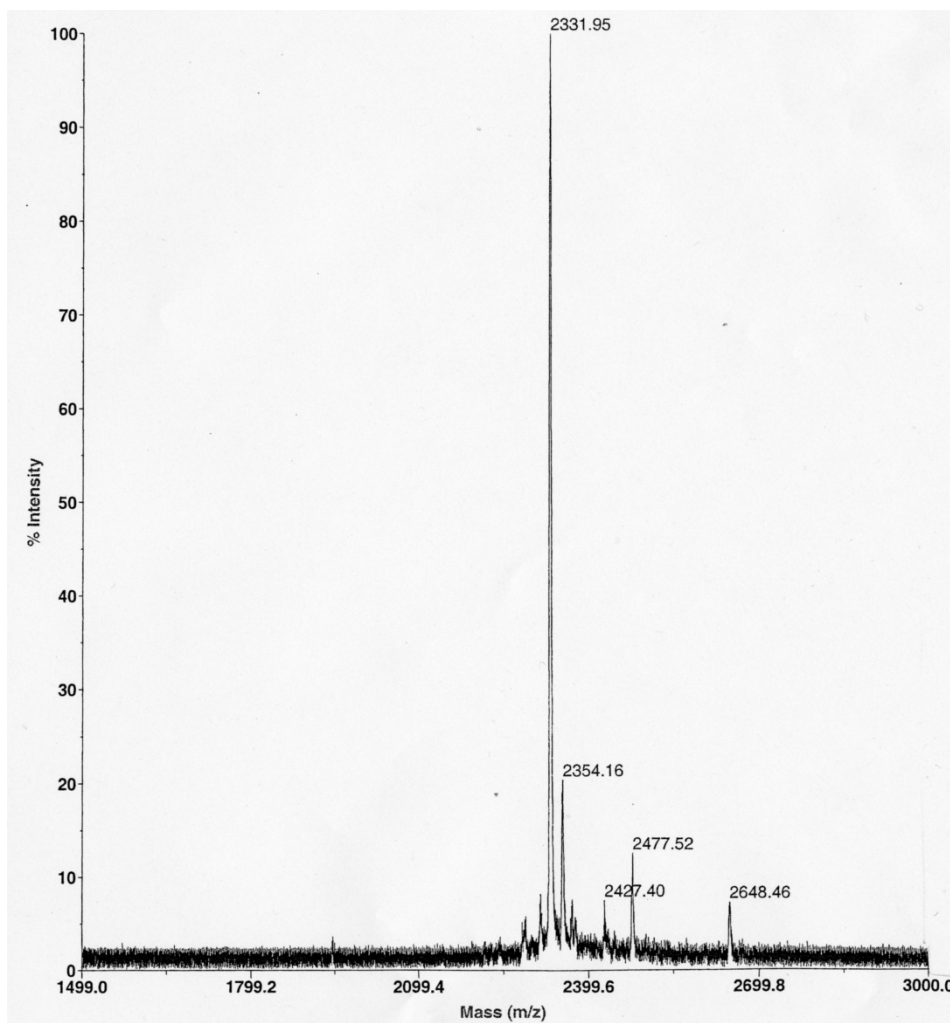

Synthesized FP2 were confirmed by LCMS (Figures S3 and S4).

**Figure S3.** HPLC analysis of synthesized FP2 using XTerra MS C18 ( $4.6 \times 150 \text{ mm} \times 3 \mu\text{m}$ ) with UV detect at 220 nm (Linear gradients between 0%  $\text{CH}_3\text{CN}$  and 100%  $\text{H}_2\text{O}$  to 40%  $\text{CH}_3\text{CN}$  and 60%  $\text{H}_2\text{O}$  in 15 min at a flow rate of 2 mL/min).

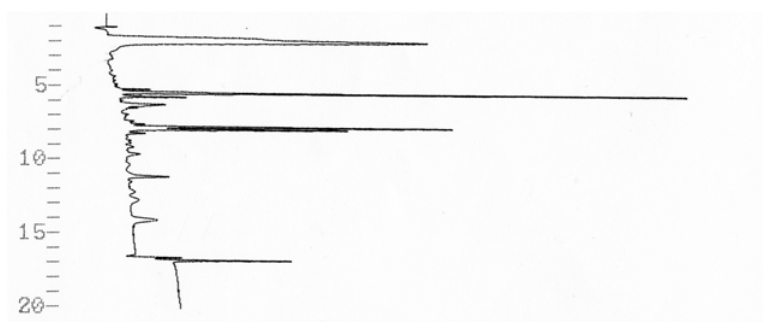

**Figure S4.** LCMS spectrum of synthesized FP2 with API 150EX (AB SCIEX).

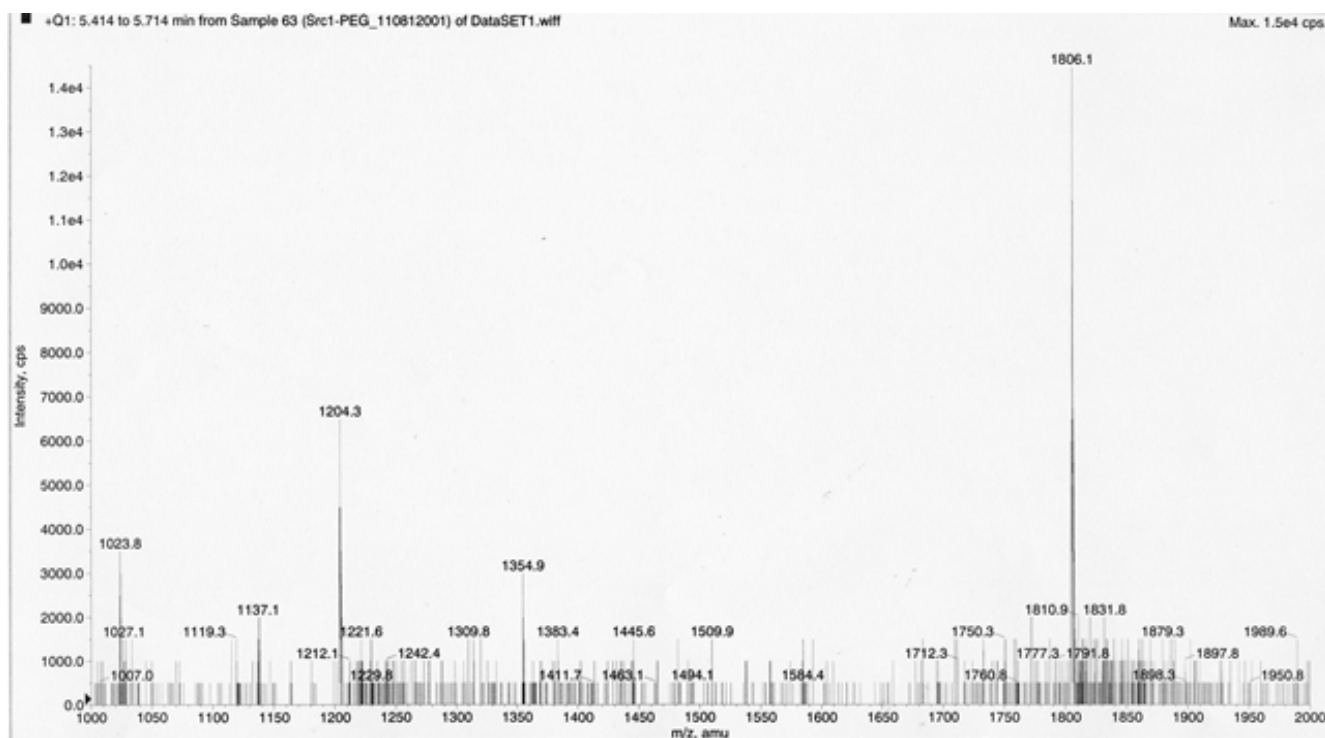

© 2012 by the authors; licensee MDPI, Basel, Switzerland. This article is an open access article distributed under the terms and conditions of the Creative Commons Attribution license (<http://creativecommons.org/licenses/by/3.0/>).
